# Supplementary material
Source: Springer Nature journal article supplement (https://www.springermedizin.de/resource/supplementary/12882_2007_94_MOESM1_ESM.pdf/9454980)
Supplement: MOESM1 [file 9454980]

## Search Results

MEDLINE, CINAHL and  
CENTRAL: 256

Excluded: 217

Search overlap: 35

Review articles: 43

Irrelevant outcomes: 139

Full text analysis: 39

Excluded: 21

Review articles: 11

Irrelevant outcomes: 10

Studies included in final  
review: 18

Prospective cohort study: 2

Retrospective study: 12

Physician survey: 4
